# Supplementary material
Source: PubMed Central journal article supplement (PMC1618100)
Supplement: 7601366s1.pdf [file 7601366s1.pdf]

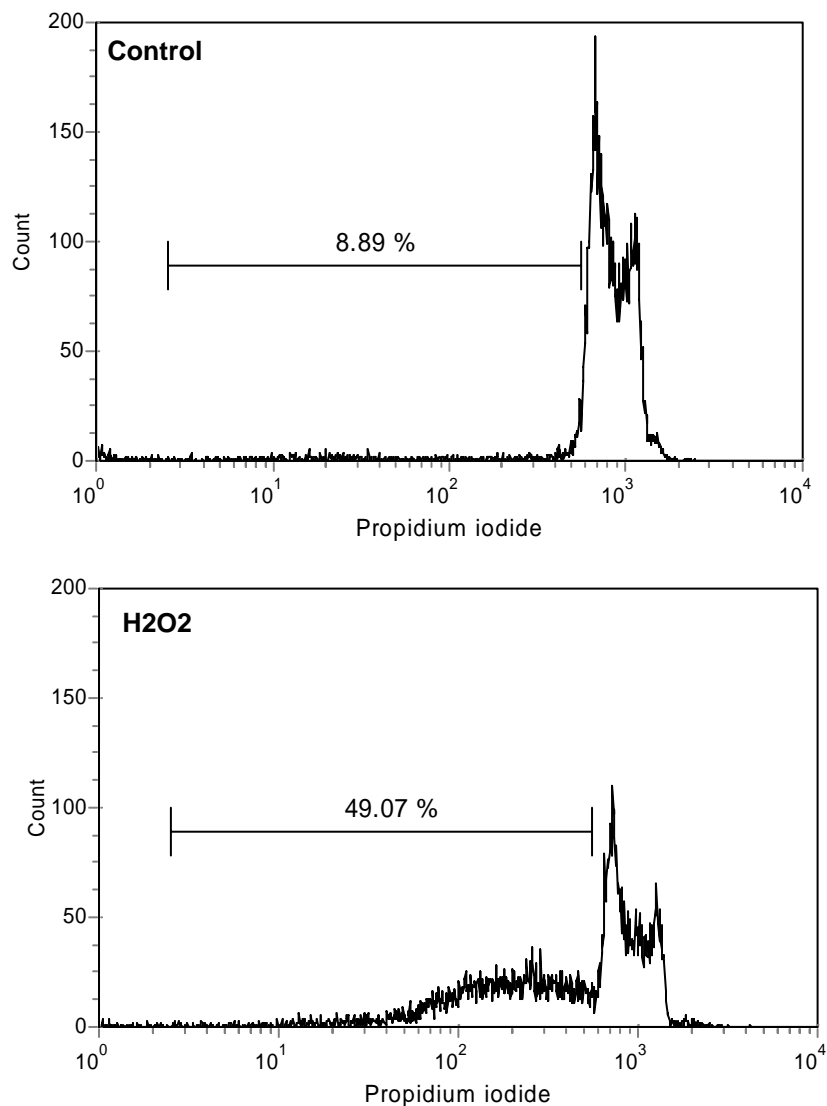

**Supplementary figure 1.** ST15A cells were incubated with 100 $\mu$ M H<sub>2</sub>O<sub>2</sub> for 6 h. The percentage of apoptotic cells was determined by flow cytometry of PI-stained nuclei. For the analysis both cells were collected, washed with PBS and suspended in 300  $\mu$ l of hypotonic solution containing propidium iodide (10  $\mu$ g/ml PI, 0.1% sodium citrate, 0.1% Triton X-100). Cells were incubated in solution over night at +4 °C and analysed by flow cytometry. The fragmented apoptotic nuclei are denoted by the line.
