# Supplementary material
Source: PubMed Central journal article supplement (PMC1618100)
Supplement: 7601366s2.pdf [file 7601366s2.pdf]

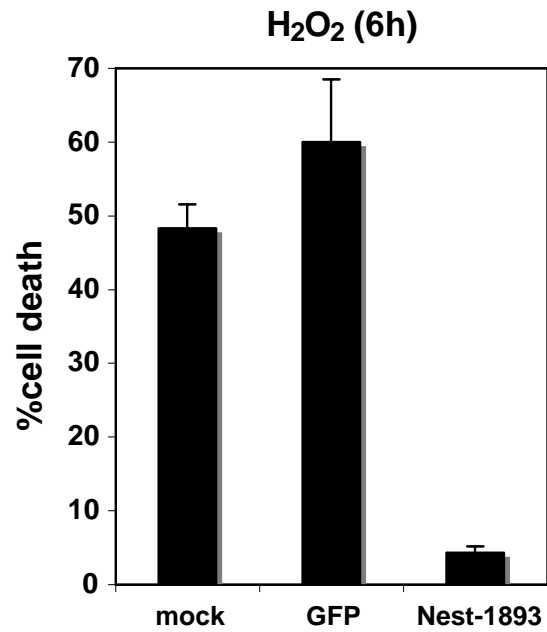

**Supplementary figure 2**

Quantification of cell death by DAPI labeling to visualize chromatin condensation at 6 hours of H<sub>2</sub>O<sub>2</sub>-treatment in mock, GFP and nestin-1893 transfected cells. The graph represents results from three experiments.
