# Supplementary material
Source: PubMed Central journal article supplement (PMC1618100)
Supplement: 7601366s3.pdf [file 7601366s3.pdf]

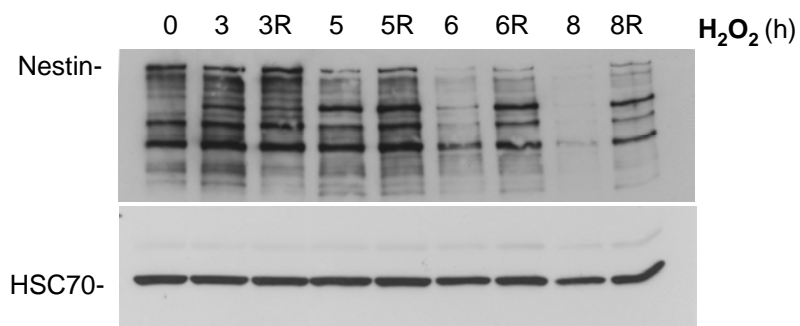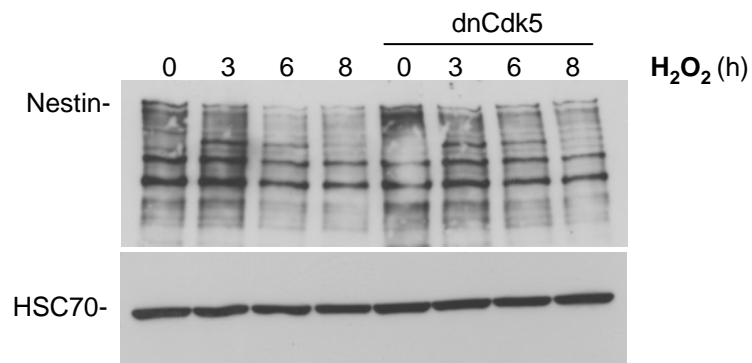

**Supplementary figure 3.**

Analysis of the involvement of Cdk5 in regulation of nestin turn-over during oxidative stress. (Upper panel) Western blotting of whole cell extracts of control and Roscovitine (R) treated ST15A cells at different time points of H<sub>2</sub>O<sub>2</sub> treatment. (Lower panel) Western blotting of whole cell extracts of control and dnCdk5 transfected ST15A cells at different time points of H<sub>2</sub>O<sub>2</sub> treatment.
