# Supplementary material
Source: PubMed Central journal article supplement (PMC1618100)
Supplement: 7601366s4.pdf [file 7601366s4.pdf]

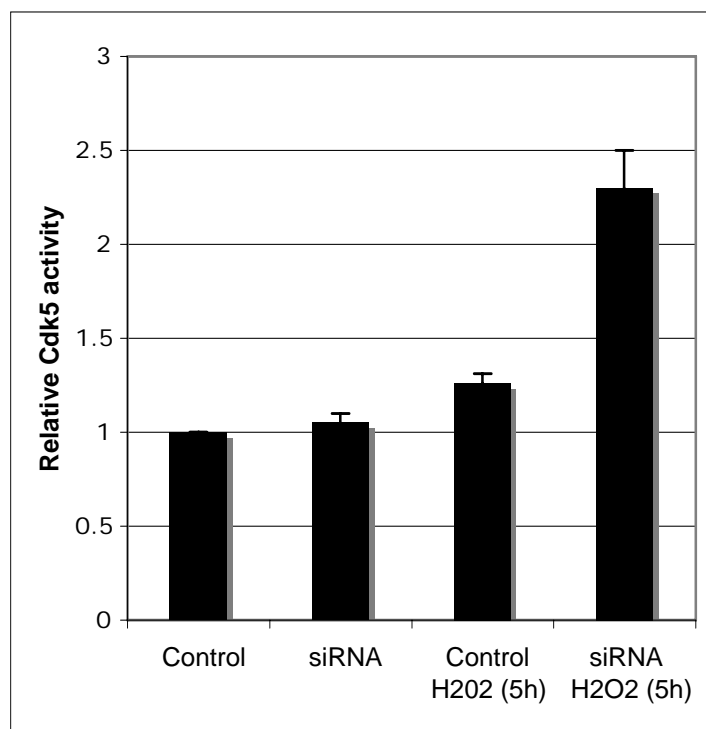

**Supplementary figure 4.**

Effect of nestin depletion on Cdk5 activity in control and H<sub>2</sub>O<sub>2</sub>-treated cells. Quantification of Cdk5 activity in control and nestin siRNA treated cells as measured by kinase assays. The graph represents the results from three independent experiments.
